# Mapping the human kinome in response to DNA damage

Michel Owusu<sup>1</sup>, Peter Bannauer<sup>1</sup>, Athanasios Mourikis<sup>2</sup>, Alistair Jones<sup>2</sup>, Joana Ferreira da Silva<sup>1</sup>, Michael Caldera<sup>1</sup>, Marc Wiedner<sup>1</sup>, Charles-Hugues Lardeau<sup>1,3</sup>, Jörg Menche<sup>1</sup>, Stefan Kubicek<sup>1,3</sup>, Francesca Ciccarelli<sup>2</sup> and Joanna I. Loizou<sup>1,4</sup>

<sup>1</sup>CeMM Research Center for Molecular Medicine of the Austrian Academy of Sciences, Lazarettgasse 14, AKH BT 25.3, 1090 Vienna, Austria

<sup>2</sup>The Francis Crick Institute, 1 Midland Road, London NW1 1AT, UK

<sup>3</sup>Christian Doppler Laboratory for Chemical Epigenetics and Antiinfectives, CeMM Research Center for Molecular Medicine of the Austrian Academy of Sciences, 1090 Vienna, Austria

<sup>4</sup>Corresponding author

Running title: Response of kinome to DNA damage

Key words: Kinome, kinase, DNA damage, chemotherapeutics, carmustine, temozolomide, synthetic lethality.

Lead contact: Joanna I. Loizou

Email: [jloizou@cemm.oeaw.ac.at](mailto:jloizou@cemm.oeaw.ac.at)

## 22 **Summary**

23 We provide a catalog for the effects of the human kinome on cell survival in response to  
24 DNA damaging agents, selected to cover all major DNA repair pathways. By treating 313  
25 kinase-deficient cell lines with ten diverse DNA damaging agents, including seven commonly  
26 used chemotherapeutics, we were able to identify kinase specific vulnerabilities and  
27 resistances. In order to identify novel synthetic lethal interactions, we investigate the cellular  
28 response to carmustine for 25 cell lines, by establishing a phenotypic FACS assay designed  
29 to mechanistically investigate and validate gene-drug interactions. We show apoptosis, cell  
30 cycle, DNA damage and proliferation after alkylation or crosslink-induced damage for  
31 selected cell lines and rescue the cellular sensitivity of DYRK4, EPHB6, MARK3, PNCK as a  
32 proof of principle for our study. Our data suggest that some cancers with inactivated DYRK4,  
33 EPHB6, MARK3 or PNCK gene could be particularly vulnerable to treatment by alkylating  
34 chemotherapeutic agents carmustine or temozolomide.

35

## 36 **Introduction (<200 words)**

37 The DNA damage response (DDR) is elicited by a complex and far-reaching network of  
38 proteins that are commonly deregulated in human pathologies, including cancer<sup>1</sup>. Besides  
39 surgery, the most common treatment for cancer patients is radio- or chemotherapy. To date,  
40 some of the commonly used chemotherapeutic compounds are DNA damaging agents<sup>2</sup>.  
41 DNA damaging agents can cause cell death by targeting either DNA directly or proteins  
42 implicated in DNA repair and replication, cell cycle regulators or signal transducers. Protein  
43 kinases are an important group of signal transducers and are often deregulated in human  
44 cancer<sup>3</sup>, making them particularly interesting to study within the signaling context of the DNA  
45 damage response. Moreover, kinases represent an important group of drug targets<sup>4</sup>, due to  
46 their enzymatic function, and therefore results from loss-of-function studies with kinases are  
47 more likely to be translated into a therapeutic setting. Kinases have broad functions following  
48 DNA damage. For instance, the ATM superfamily which includes ATM, ATR and DNA-PKcs  
49 (encoded by the gene PRKDC) is involved in sensing or amplifying initial signals of DNA  
50 lesions<sup>5,6</sup>. CHK1 and CHK2 kinases, regulate cell cycle progression in response to DNA  
51 damage, providing time for DNA repair<sup>7,8</sup>. Other kinases such as ABL1 are involved in  
52 transducing or fine tuning signals resulting from DNA damage, which can ultimately lead to  
53 survival, senescence or cell death<sup>9</sup>. Though some kinases have been studied in depth, the  
54 role of many is still not known<sup>10</sup>. Here, we used CRISPR-Cas9 to individually delete  
55 expressed and non-essential kinases in human HAP1 cells. Next, we performed a drug  
56 screen using DNA damaging agents, selected to cover all major DNA repair pathways, to  
57 map drug specific sensitivities and resistances. We validated selected drug-gene  
58 interactions in response to alkylation-induced damage and assessed the contribution of

59 apoptosis, DNA damage, cell cycle arrest and proliferation leading to cellular sensitivities or  
60 resistances by designing and utilizing a phenotypic assay.

61

## 62 **Results**

63 We used CRISPR-Cas9 to target 313 expressed and non-essential kinases in human HAP1  
64 cells and produce clonal knock-out cell lines<sup>11</sup> (**Supp. Table 1**). The kinase genes targeted  
65 cover all groups, according to the standard classification scheme of kinases<sup>12</sup>, hence  
66 ensuring coverage (**Figure 1a**). To examine the response of the non-essential human  
67 kinome to a broad range of DNA damaging agents, we first designed and optimized our  
68 approach using DNA repair deficient cell lines, where we were able to recover known gene-  
69 drug interactions (**Figure 1b & Supp. Figure 1**). Based on this approach, we selected 10  
70 compounds that (1) induce different types of DNA damage and thus utilize distinct DNA  
71 repair pathways and (2) are frequently used as chemotherapeutics (**Figure 1c**). Next, we  
72 exposed the 313 kinase-deficient cell lines to these compounds at four concentrations and  
73 assessed cellular survival after three days (**Figure 1b**).

74

75 Based on literature, most cell lines showing strong sensitivity or resistance to the  
76 compounds were anticipated (**Figure 1d, Supp. Table 1**). For instance, PRKDC depleted  
77 cells showed the strongest sensitivity to DNA double-strand break inducing agents,  
78 etoposide and doxorubicin, whereas ABL1 depleted cells showed resistance those agents<sup>9</sup>.

79

80 A clustering of the cell lines by their sensitivity to the 10 compounds revealed 3 clusters,  
81 characterized by high sensitivity to carmustine (Cluster 1), hydroxyurea (Cluster 2) and DNA  
82 double-strand break inducing agents, such as etoposide and doxorubicin (Cluster 3) (**Figure**  
83 **1e, Supp. Table 1**). As expected, we found that compounds with similar modes of action  
84 were closer in the clustering, as illustrated by topoisomerase II inhibitors (doxorubicin and  
85 etoposide), topoisomerase I inhibitors (topotecan and camptothecin) and agents that  
86 induced replicative stress (aphidicolin and cytarabine). Due to their clustering with DNA  
87 double-strand break inducing agents, our data support the notion that DNA double-strand  
88 breaks, following replication fork stalling and collapse, are one of the primary sources of  
89 cellular death after treatment with lethal concentrations of aphidicolin, cytarabine or  
90 topoisomerase I inhibitors<sup>13</sup> (**Figure 1e**). Interestingly, Cluster 1 was significantly enriched  
91 for genes associated with increased chromatin accessibility, compared to clusters 2 and 3  
92 (**Figure 1f**). Alkylating agents, carmustine and temozolomide (TMZ), have been reported to  
93 have a global effect on nuclear organization and chromatin structure, inducing chromatin  
94 condensation and gene silencing<sup>14</sup>. We therefore reasoned that in the absence of a kinase in  
95 Cluster 1, cellular death upon carmustine treatment may be due to an alkylation induced

96 synthetic lethality. Differential gene ontology (GO) term enrichment analysis (**Figure 1g**,  
97 **Supp. Table 2**) confirmed that Cluster 1 was uniquely enriched for terms previously  
98 associated to cellular response to alkylating or crosslinking agents: upregulation of vascular  
99 endothelial growth factor receptors<sup>15</sup>, induction of oxidative stress<sup>16</sup> (cellular response to  
100 hydrogen peroxide, positive regulation of cytochrome-c oxidase activity), which in turn leads  
101 to actin cytoskeleton reorganization<sup>17</sup> (**Figure 1h**).

102  
103 Since kinases are highly associated with cancer<sup>18</sup>, and moreover being enzymes they are  
104 potentially amenable to chemical inhibition, we focused on carmustine dependent synthetic  
105 lethal interactions. Moreover, we found that cell lines lacking MARK3, PRKACA, CSNK1G1,  
106 PNCK, DYRK4 or EPHB6 in combination with carmustine, showed the strongest unreported  
107 synthetic lethal interaction in the screen (**Figure 1d**). To validate and further dissect the  
108 mechanism of cellular sensitivity to the drug, we measured DNA damage, apoptosis, cell  
109 cycle phases and proliferation in those cell lines in a FACS-based phenotypic assay (**Figure**  
110 **2a**) with the markers  $\gamma$ H2AX, TUNEL, DAPI and EdU, respectively. As controls, we included  
111 cell lines lacking proteins previously linked to the signaling of DNA damage or DNA repair  
112 (PRKDC, ABL1<sup>19</sup>, PDK2<sup>20</sup>, PIM2<sup>21</sup> and TNK2<sup>22</sup>), cell cycle (CDK10, CLK1 and CDKL1), cell  
113 death (GRK6<sup>23,24</sup>, GSK3B<sup>25</sup>, MAST1<sup>26</sup>, STK10<sup>27</sup> and STK3<sup>28</sup>) and a gene with a strong  
114 general resistance to DNA damaging agents as revealed in our study (TSSK3) (**Figure 1h**).  
115 Carmustine is a chemotherapeutic agent used for the treatment of several types of cancers,  
116 particularly those relating to the nervous system, such as glioblastoma<sup>29,30</sup>. It is a bifunctional  
117 alkylating agent that produces DNA mono-alkylation adducts as well as DNA intra- and  
118 interstrand crosslinks (ICLs)<sup>31,32</sup>. Almost all of the lesions (90 - 95%) produced by  
119 bifunctional alkylating agents are mono alkylation adducts<sup>33</sup>, such as N<sup>7</sup>-methylguanine or  
120 O<sup>6</sup>-methylguanine. However, the less abundant (ca. 5%) DNA crosslinks, particularly ICLs,  
121 form the most deleterious lesions<sup>33</sup> and can interfere with replication or transcription and  
122 trigger apoptosis and cell cycle arrest<sup>32</sup>. In order to confirm that the predominant cause of  
123 cellular toxicity to carmustine was due to the effects of alkylation, we used the  
124 monofunctional alkylating agent temozolomide (TMZ), which does not produce crosslinks  
125 and is often used as a superior replacement therapy to carmustine<sup>34</sup>, and the crosslinking  
126 agent oxaliplatin (**Supp. Figure 1b**). We chose concentrations of the compounds that  
127 moderately affect wild-type cells and as expected, both compounds induced apoptosis, DNA  
128 damage, G2/M cell cycle arrest and a reduction of proliferating cells in a dose- and time-  
129 dependent manner<sup>35,36</sup> (**Figure 2b-c**). Hierarchical clustering of the cell lines according to  
130 apoptosis confirmed that the cellular sensitivity to carmustine was predominantly due to  
131 alkylation induced synthetic lethality: the most sensitive survival interactions after carmustine  
132 (**Figure 1h**) showed the highest apoptosis after TMZ in the phenotypic assay (**Figure 2b**).

133

134 DNA damage as measured by  $\gamma$ H2AX can either be a cause or consequence of apoptosis<sup>37</sup>.  
135 For a gene to be involved in the signaling or repair of DNA damage, we would expect to see  
136 higher levels of  $\gamma$ H2AX preceding or coinciding with higher levels of apoptosis. For instance,  
137 DYRK4-deficient cells showed a peak of apoptosis 24 hours after treatment followed by a  
138 peak of  $\gamma$ H2AX at 48 hours of treatment (**Figure 2b**). Hence, the  $\gamma$ H2AX signal at the 48 hour  
139 time point may therefore be a consequence of apoptosis in DYRK4-deficient cells. This may  
140 also be the case for PNCK and PKN2 (**Figure 2b**). In contrast, PRKDC-deficient cells, which  
141 have a deficiency in DNA repair, showed the maximum levels of  $\gamma$ H2AX and apoptosis early,  
142 at 24 hours after treatment, followed by a slow but coinciding recovery of  $\gamma$ H2AX and  
143 apoptosis at 48 hours after treatment (**Figure 2b**). A similar, albeit weaker phenotype can be  
144 observed in cells deficient for CSNK1G1, EPHB6, MARK3, PRKACA (**Figure 2b**).  
145 Interestingly, we also observed a strong and persistent G2/M arrest in cells deficient for  
146 CSNK1G1 or EPHB6 (**Figure 2b**). Although the sensitivity of these kinase-deficient cells to  
147 alkylating agents revealed in our assay is as of yet unreported, it is in line with what is known  
148 about their function: CSNK1G1 has previously been reported to regulate the kinase CHK1,  
149 which is a cell cycle regulator following DNA damage<sup>38</sup> whereas EPHB6 has been linked to  
150 the regulation of NPAT, a DNA damage signaling and cell cycle regulator<sup>39</sup>.

151

152 After confirming selected cellular survival phenotypes in our phenotypic screen, we next  
153 sought to validate gene-drug interactions in knockout cell lines by reconstitution of the wild-  
154 type genes. We selected the understudied kinases, DYRK4, EPHB6, PNCK and MARK3, as  
155 well as control kinases with resistance phenotypes, ABL1 and TSSK3 (**Figure 1h, Supp.**  
156 **Figure 2a**). After expression of HA-tagged inducible proteins (**Figure 2d**) in the deficient cell  
157 lines, we assessed whether cellular survival to DNA damage was reverted. Indeed, the  
158 sensitivity and resistance phenotypes could be corrected by recombinant expression of the  
159 relevant proteins hence establishing a coherent genotype-phenotype relationship (**Figure**  
160 **2e, Supp. Figure 2c-e**). ABL1 and TSSK3 deficient cells, which showed resistance to  
161 doxorubicin or hydroxyurea in the survival screen, became significantly sensitive after  
162 reconstitution (**Supp. Figure 2c-e**), whereas DYRK4, EPHB6, PNCK and MARK3 which  
163 showed sensitivities in survival after alkylation-induced damage, became significantly more  
164 resistant after reconstitution of the respective wild-type genes (**Figure 2e**).

165

## 166 **Discussion**

167 Unperturbed signaling of DNA damage is essential in guarding the genome against cancer<sup>40</sup>.  
168 At the same time targeting the DNA damage response has proven to be a successful

169 strategy in cancer therapy. In this study, we have shown the response of 313 cell lines,  
170 lacking kinases involved in different cellular signaling pathways, against 10 diverse DNA  
171 damaging agents, including 7 commonly used chemotherapeutics. In doing so, we have  
172 identified unreported synthetic lethal and resistance gene-drug interactions. Moreover, we  
173 reveal that a sensitivity to carmustine may be important for a cluster of genes associated  
174 with chromatin accessibility. For selected cell lines, we further probe the synthetic lethality  
175 with carmustine by designing a phenotypic assay to investigate and validate gene-drug  
176 interactions in a broad manner. We show apoptosis, cell cycle, DNA damage and  
177 proliferation after alkylation or crosslink-induced damage for those cell lines. Moreover, we  
178 rescue the survival phenotype of DYRK4, EPHB6, MARK3, PNCK as a proof of principle for  
179 our study in reconstitution experiments. Our data suggests that some cancers with  
180 inactivated DYRK4, EPHB6, MARK3 or PNCK could be particularly vulnerable to alkylating  
181 agents. For example, EPHB6 is found to be downregulated in diverse metastatic cancers,  
182 including lung<sup>41</sup>, breast<sup>42</sup> and brain<sup>43</sup> cancers. Treatment of EPHB6 deficient cancers with  
183 the chemotherapeutic agents carmustine or TMZ may therefore represent a promising  
184 therapeutic strategy.

185

#### 186 **Experimental Procedures (<100 words)**

187 Experimental procedures can be found in the Supplemental Information.

188

#### 189 **Author Contributions**

190 M.O., P.B., MW and C.-H.L. carried out the experimental work. M.O., P.B., A.M., A.J., M.C.  
191 and J.F.daS. performed data analysis. Writing was by M.O. with J.I.L. The project was  
192 conceptualized by M.O. and J.I.L. Project administration was by S.K., J.M., F.C. and J.I.L.  
193 Funding acquisition was by S.K., F.C., J.M. and J.I.L. All authors reviewed and commented  
194 on the manuscript.

195

#### 196 **Acknowledgements**

197 Research in the Kubicek lab is supported by the Austrian Federal Ministry of Science,  
198 Research and Economy, the National Foundation for Research, Technology, and  
199 Development. M.O., P.B. and J.F.daS. were supported by FWF grant awarded to J.L.  
200 (29555 and 29763).

201

202

#### 203 **References**

204

205 1. Jackson, S. P. & Bartek, J. The DNA-damage response in human biology and



- 206 disease. *Nature* **461**, 1071–1078 (2009).
- 207 2. Helleday, T., Petermann, E., Lundin, C., Hodgson, B. & Sharma, R. A. DNA repair  
208 pathways as targets for cancer therapy. *Nature Reviews Cancer* **8**, 193–204 (2008).
- 209 3. Fleuren, E. D. G., Zhang, L., Wu, J. & Daly, R. J. The kinome ‘at large’ in cancer.  
210 *Nature Reviews Cancer* **16**, 83–98 (2016).
- 211 4. Klaeber, S. *et al.* The target landscape of clinical kinase drugs. *Science* **358**,  
212 eaan4368 (2017).
- 213 5. Maréchal, A. & Zou, L. DNA damage sensing by the ATM and ATR kinases. *Cold*  
214 *Spring Harb Perspect Biol* **5**, a012716–a012716 (2013).
- 215 6. Hiom, K. DNA repair: how to PIKK a partner. *Curr. Biol.* **15**, R473–5 (2005).
- 216 7. Lazzaro, F. *et al.* Checkpoint mechanisms at the intersection between DNA damage  
217 and repair. *DNA Repair (Amst.)* **8**, 1055–1067 (2009).
- 218 8. Manic, G., Obrist, F., Sistigu, A. & Vitale, I. Trial Watch: Targeting ATM-CHK2 and  
219 ATR-CHK1 pathways for anticancer therapy. *Mol Cell Oncol* **2**, e1012976 (2015).
- 220 9. Kharbanda, S., Yuan, Z. M., Weichselbaum, R. & Kufe, D. Determination of cell fate  
221 by c-Abl activation in the response to DNA damage. *Oncogene* **17**, 3309–3318  
222 (1998).
- 223 10. Fedorov, O., Müller, S. & Knapp, S. The (un)targeted cancer kinome. *Nat. Chem.*  
224 *Biol.* **6**, 166–169 (2010).
- 225 11. Blomen, V. A. *et al.* Gene essentiality and synthetic lethality in haploid human cells.  
226 *Science* **350**, 1092–1096 (2015).
- 227 12. Manning, G., Whyte, D. B., Martinez, R., Hunter, T. & Sudarsanam, S. The protein  
228 kinase complement of the human genome. *Science* **298**, 1912–1934 (2002).
- 229 13. Lin, C.-P., Ban, Y., Lyu, Y. L. & Liu, L. F. Proteasome-dependent processing of  
230 topoisomerase I-DNA adducts into DNA double strand breaks at arrested replication  
231 forks. *J. Biol. Chem.* **284**, 28084–28092 (2009).
- 232 14. Papait, R., Magrassi, L., Rigamonti, D. & Cattaneo, E. Temozolomide and  
233 carmustine cause large-scale heterochromatin reorganization in glioma cells.  
234 *Biochem. Biophys. Res. Commun.* **379**, 434–439 (2009).
- 235 15. Cheppudira, B. P. *et al.* Upregulation of vascular endothelial growth factor isoform  
236 VEGF-164 and receptors (VEGFR-2, Npn-1, and Npn-2) in rats with  
237 cyclophosphamide-induced cystitis. *Am. J. Physiol. Renal Physiol.* **295**, F826–36  
238 (2008).
- 239 16. Helal, G. K. & Helal, O. K. Metallothionein attenuates carmustine-induced oxidative  
240 stress and protects against pulmonary fibrosis in rats. *Arch Toxicol* **83**, 87–94  
241 (2008).
- 242 17. Pujol-Carrion, N. & la Torre-Ruiz, de, M. A. Glutaredoxins Grx4 and Grx3 of  
243 *Saccharomyces cerevisiae* Play a Role in Actin Dynamics through Their Trx  
244 Domains, Which Contributes to Oxidative Stress Resistance. *Applied and*  
245 *Environmental Microbiology* **76**, 7826–7835 (2010).
- 246 18. Torkamani, A., Verkhivker, G. & Schork, N. J. Cancer driver mutations in protein  
247 kinase genes. *Cancer Lett.* **281**, 117–127 (2009).
- 248 19. Shafman, T. *et al.* Interaction between ATM protein and c-Abl in response to DNA  
249 damage. *Nature* **387**, 520–523 (1997).
- 250 20. Viniegra, J. G. *et al.* Full activation of PKB/Akt in response to insulin or ionizing  
251 radiation is mediated through ATM. *J. Biol. Chem.* **280**, 4029–4036 (2005).
- 252 21. Zirkin, S., Davidovich, A. & Don, J. The PIM-2 kinase is an essential component of  
253 the ultraviolet damage response that acts upstream to E2F-1 and ATM. *J. Biol.*  
254 *Chem.* **288**, 21770–21783 (2013).
- 255 22. Mahajan, K. *et al.* Ack1-mediated androgen receptor phosphorylation modulates  
256 radiation resistance in castration-resistant prostate cancer. *J. Biol. Chem.* **287**,  
257 22112–22122 (2012).
- 258 23. Le, Q. *et al.* GRK6 regulates ROS response and maintains hematopoietic stem cell  
259 self-renewal. *Cell Death Dis* **7**, e2478–e2478 (2016).
- 260 24. Xu, L.-Q. *et al.* G protein-coupled receptor kinase 6 is overexpressed in glioma and

- 261 promotes glioma cell proliferation. *Oncotarget* **8**, 54227–54235 (2017).
- 262 25. Grassilli, E. *et al.* Inhibition of GSK3B bypass drug resistance of p53-null colon  
263 carcinomas by enabling necroptosis in response to chemotherapy. *Clin. Cancer*  
264 *Res.* **19**, 3820–3831 (2013).
- 265 26. De Angelis, P. M., Svendsrud, D. H., Kravik, K. L. & Stokke, T. Cellular response to  
266 5-fluorouracil (5-FU) in 5-FU-resistant colon cancer cell lines during treatment and  
267 recovery. *Mol. Cancer* **5**, 20 (2006).
- 268 27. Fukumura, K. *et al.* STK10 missense mutations associated with anti-apoptotic  
269 function. *Oncol. Rep.* **30**, 1542–1548 (2013).
- 270 28. Lee, K. K., Ohyama, T., Yajima, N., Tsubuki, S. & Yonehara, S. MST, a  
271 physiological caspase substrate, highly sensitizes apoptosis both upstream and  
272 downstream of caspase activation. *J. Biol. Chem.* **276**, 19276–19285 (2001).
- 273 29. Affronti, M. L. *et al.* Overall survival of newly diagnosed glioblastoma patients  
274 receiving carmustine wafers followed by radiation and concurrent temozolomide plus  
275 rotational multiagent chemotherapy. *Cancer* **115**, 3501–3511 (2009).
- 276 30. Chaichana, K. L. *et al.* The efficacy of carmustine wafers for older patients with  
277 glioblastoma multiforme: prolonging survival. *Neurological Research* **33**, 759–764  
278 (2013).
- 279 31. Kondo, N., Takahashi, A., Ono, K. & Ohnishi, T. DNA damage induced by alkylating  
280 agents and repair pathways. *J Nucleic Acids* **2010**, 543531–7 (2010).
- 281 32. Nikolova, T., Roos, W. P., Krämer, O. H., Strik, H. M. & Kaina, B. Chloroethylating  
282 nitrosoureas in cancer therapy: DNA damage, repair and cell death signaling.  
283 *Biochim. Biophys. Acta* **1868**, 29–39 (2017).
- 284 33. Muniandy, P. A., Liu, J., Majumdar, A., Liu, S.-T. & Seidman, M. M. DNA interstrand  
285 crosslink repair in mammalian cells: step by step. *Crit. Rev. Biochem. Mol. Biol.* **45**,  
286 23–49 (2010).
- 287 34. Vinjamuri, M., Adumala, R. R., Altaha, R., Hobbs, G. R. & Crowell, E. B.  
288 Comparative analysis of temozolomide (TMZ) versus 1,3-bis (2-chloroethyl)-1  
289 nitrosourea (BCNU) in newly diagnosed glioblastoma multiforme (GBM) patients. *J.*  
290 *Neurooncol.* **91**, 221–225 (2009).
- 291 35. William-Faltaos, S., Rouillard, D., Lechat, P. & Bastian, G. Cell cycle arrest by  
292 oxaliplatin on cancer cells. *Fundam Clin Pharmacol* **21**, 165–172 (2007).
- 293 36. Hirose, Y., Berger, M. S. & Pieper, R. O. p53 effects both the duration of G2/M  
294 arrest and the fate of temozolomide-treated human glioblastoma cells. *Cancer Res.*  
295 **61**, 1957–1963 (2001).
- 296 37. Rogakou, E. P., Nieves-Neira, W., Boon, C., Pommier, Y. & Bonner, W. M. Initiation  
297 of DNA fragmentation during apoptosis induces phosphorylation of H2AX histone at  
298 serine 139. *J. Biol. Chem.* **275**, 9390–9395 (2000).
- 299 38. Meng, Z., Capalbo, L., Glover, D. M. & Dunphy, W. G. Role for casein kinase 1 in  
300 the phosphorylation of Claspin on critical residues necessary for the activation of  
301 Chk1. *Mol. Biol. Cell* **22**, 2834–2847 (2011).
- 302 39. Kandpal, R. P. Tyrosine kinase-deficient EphB6 receptor-dependent alterations in  
303 proteomic profiles of invasive breast carcinoma cells as determined by difference gel  
304 electrophoresis. *Cancer Genomics Proteomics* **7**, 253–260 (2010).
- 305 40. Bartkova, J. *et al.* Oncogene-induced senescence is part of the tumorigenesis  
306 barrier imposed by DNA damage checkpoints. *Nature* **444**, 633–637 (2006).
- 307 41. Müller-Tidow, C. *et al.* Identification of metastasis-associated receptor tyrosine  
308 kinases in non-small cell lung cancer. *Cancer Res.* **65**, 1778–1782 (2005).
- 309 42. Fox, B. P. & Kandpal, R. P. EphB6 receptor significantly alters invasiveness and  
310 other phenotypic characteristics of human breast carcinoma cells. *Oncogene* **28**,  
311 1706–1713 (2009).
- 312 43. Tang, X. X. *et al.* High-level expression of EPHB6, EFNB2, and EFNB3 is  
313 associated with low tumor stage and high TrkA expression in human  
314 neuroblastomas. *Clin. Cancer Res.* **5**, 1491–1496 (1999).
- 315 44. Muellner, M. K. *et al.* TOPS: a versatile software tool for statistical analysis and



- 316 visualization of combinatorial gene-gene and gene-drug interaction screens. *BMC*  
317 *Bioinformatics* **15**, 98 (2014).
- 318 45. Englinger, B. *et al.* Acquired nintedanib resistance in FGFR1-driven small cell lung  
319 cancer: role of endothelin-A receptor-activated ABCB1 expression. *Oncotarget* **7**,  
320 (2016).
- 321 46. Lawrence, M. S. *et al.* Mutational heterogeneity in cancer and the search for new  
322 cancer-associated genes. *Nature* **499**, 214–218 (2013).
- 323 47. Kuleshov, M. V. *et al.* Enrichr: a comprehensive gene set enrichment analysis web  
324 server 2016 update. *Nucleic Acids Res.* **44**, W90–7 (2016).
- 325 48. JAIR, P. R. J. A. I. R. 1999. Semantic similarity in a taxonomy: An information-based  
326 measure and its application to problems of ambiguity in natural language. *jair.org*  
327
- 328 49. Supek, F., Bošnjak, M., Škunca, N. & Šmuc, T. REVIGO summarizes and visualizes  
329 long lists of gene ontology terms. *PLoS ONE* **6**, e21800 (2011).
- 330  
331

### 332 **Figure Titles and Legends**

333 **Figure 1. Survival of non-essential kinome in response to DNA damage.** (a) Kinome  
334 tree representing all kinases<sup>12</sup>. In bold squares are the kinases targeted by CRISPR-Cas9  
335 (313) and in light squares are the remaining kinases. (b) Workflow of survival assay. Dose  
336 responses were performed with 4 concentrations in 4 replicates. Cells were incubated with  
337 compounds for 3 days and survival was performed using a luminescent readout. (c) List of  
338 the 10 DNA damaging compounds selected for use in the survival assay. Compounds with  
339 similar modes of action share the same color label. (d) Survival response of cell lines to  
340 compounds: kinases from the same kinase groups are clustered together in columns. Each  
341 vertical line represents a particular knockout cell line with all of its gene-drug interactions.  
342 Compounds are depicted as different color-coded bubbles. HypoM (hypomethylating agent,  
343 Decitabine), SSB (single-strand break inducing agents), DSB (double-strand break inducing  
344 agents), ReS (replication stress inducing agents), HU (replication stress inducing agent  
345 hydroxyurea), Alk & Cros (alkylating and crosslinking agent, BNCU), Chkp (Chk1 inhibitor).  
346 Z-scores were calculated for the area under the curve (AUC) of 4 concentrations across the  
347 mean of 4 replicates, for each cell line. Lines are set at z-scores greater than 1.65 or less  
348 than -1.65 ( $p < 0.05$ ). The names of some expected or known interactions are labeled in black  
349 font. Names in red font are examples of lethal interactions after carmustine treatment. AGC=  
350 protein kinase families A, G and C; CAMK= Calmodulin/Calcium regulated kinases; CK1=  
351 Casein kinase 1; CMGC= CDK, MAPK, GSK3, CLK family; RGC= Receptor guanylate  
352 cyclases; STE= STE7, STE11 and STE20 homologs; TK= Tyrosine kinases, TKL= Tyrosine  
353 kinase like. (e) Clustering of 313 kinase-deficient cell lines in response to diverse DNA  
354 damaging agents reveals three distinct clusters (left dendrogram): Cluster 1 is characterized  
355 by a sensitivity to carmustine, Cluster 2 by a sensitivity to hydroxyurea and Cluster 3 by a  
356 sensitivity to DNA double-strand break inducing agents, notably etoposide and doxorubicin.  
357 Compounds with similar modes of action (color labels) are closer in neighborhood (top

358 dendrogram): topoisomerase II inhibitors (doxorubicin, etoposide), topoisomerase I inhibitors  
359 (topotecan, camptothecin), replication stress inducing agents by fork staling (cytarabine,  
360 aphidicolin). (f) Difference in chromatin accessibility of genes from Cluster 1, defined by  
361 sensitivity to carmustine compared to genes from Cluster 2 or 3. Increasing Hi-C values  
362 correspond to increasing chromatin accessibility. (g) Gene ontology (GO) term enrichment  
363 analysis for Clusters 1 - 3. (h) GO terms enriched for Cluster 1 uniquely.

364

365 **Figure 2. Phenotypic and genetic validation of sensitivity to alkylating agents.** (a)

366 Workflow of phenotypic screen. Wild-type and 25 CRISPR-Cas9 knockout cell lines were  
367 treated with alkylating or crosslinking agents (temozolomide or oxaliplatin, respectively) for 5  
368 or 24 hours, after which drug medium was replaced with fresh medium to allow cells to  
369 recover from damage. EdU incorporation was performed for 40 minutes before harvest.  
370 Cells were fixed and co-stained using the following markers: TUNEL for apoptosis, anti-  
371  $\gamma$ H2AX for DNA damage, DAPI for cell cycle and EdU stain for proliferation. Cells were  
372 analysed by flow cytometry. For each stain, the six concentrations for each time point were  
373 summarized with an area under the curve (AUC) calculation. Bottom: Figure legend and  
374 phenotypic plot of wild-type HAP1 cells after temozolomide treatment (right). (b-c)  
375 Phenotypic plot for cell lines after alkylation-induced damage by temozolomide (b) or  
376 crosslinking induced damage by oxaliplatin (c). The inner most circle of the phenotypic plot  
377 shows DNA damage (color gradient of bubbles) and apoptosis (size of bubbles) for 4  
378 different time points, t1 - t4, from center to periphery, and indicated cell lines. The next circle  
379 (middle) shows cell cycle distribution of cell lines in G1 (green), S (purple), and G2/M  
380 (orange) for time points t1 - t4, from center to periphery. The outermost circle shows  
381 proliferation changes of cell lines at time point t1 - t4. Cell lines are ordered hierarchically  
382 according to apoptosis and names are indicated outside of the phenotypic plot. Cells  
383 identified to be sensitive to carmustine (red names) show a high levels of apoptosis to  
384 temozolomide (7/10) but not to oxaliplatin (2/10), indicating that the survival response is  
385 primarily due to alkylating and not crosslinking lesions. Wild-type HAP1 cells (WT) are  
386 highlighted in a box. Figure legend as in (a). (d-e) Rescue of sensitivity to alkylating agents  
387 after reconstitution of knockout cell lines with HA-tagged, doxycycline inducible DYRK4,  
388 EPHB6, PNCK or MARK3 proteins. (d) Anti-HA immunoblot of the indicated cells lines  
389 reconstituted with the relevant cDNA after doxycycline induction. EPHB6, shows a  
390 characteristic smear of a fragmented membrane protein by immunoblotting. \* indicates non-  
391 specific band. Tubulin was used as a loading control. (e) Upon temozolomide (TMZ)  
392 treatment, sensitivities of DYRK4, EPHB6, PNCK and MARK3 deficient cells are rescued  
393 after expression of exogenous proteins by doxycycline induction. Results are means of 3  
394 replicates with standard deviations.

395

396 **Supp. Figure 1. Survival of DNA repair deficient cell lines in response to DNA damage.**

397 (a) List of DNA repair deficient cell lines generated by CRISPR-Cas9 in human HAP1 cells  
398 (b) and their survival response to DNA damaging compounds are depicted in a circular  
399 bubble plot: DNA double-strand break repair deficient  $\Delta$ PRKDC,  $\Delta$ XRCC4,  $\Delta$ XLF and  
400  $\Delta$ DCLRE1C are sensitive to DNA double-strand break inducing agents, doxorubicin and  
401 etoposide. Crosslinking repair deficient  $\Delta$ FANCA,  $\Delta$ FANCB,  $\Delta$ FANCC and  $\Delta$ FANCG are  
402 sensitive to crosslinking agents MMC, cisplatin and oxaliplatin.  $\Delta$ MGMT and  $\Delta$ XPC, deficient  
403 in the repair of alkylating adducts, are sensitive to the nonfunctional alkylating agent TMZ.  
404 Cell lines deficient in the repair of alkylation damage ( $\Delta$ MGMT and  $\Delta$ XPC) or crosslink  
405 induced lesions ( $\Delta$ FANCG) are sensitive to the bifunctional alkylating agent carmustine.  
406 Each compound is represented by 4 dose points with a mean of 4 replicates per dose point.  
407 H<sub>2</sub>O<sub>2</sub>, Hydrogen peroxide; MMS, Methyl methanesulfonate; Negative control, DMSO;  
408 Positive control, 25X camptothecin (cytotoxic concentration). The color represents the drug-  
409 gene interaction, distance from the center indicates score/p-value and bubble size  
410 corresponds to the magnitude of the measured effect (over all other perturbations)<sup>44</sup>.

411

412 **Supp. Figure 2. Rescue of resistance phenotypes after reconstitution of knockout cell  
413 lines with HA-tagged, doxycycline inducible proteins.** (a-b) Validation of resistant

414 survival responses of  $\Delta$ TSSK3 to hydroxyurea and  $\Delta$ BL1 to doxorubicin. (c) Anti-HA  
415 immunoblot of the indicated cell lines after doxycycline induction of the relevant cDNA.  
416 Expressed genes correspond to expected sizes. Wild-type control, WT, shows no affinity to  
417 anti-HA. \* indicates non-specific band. Tubulin was used as a loading control. (d) Upon  
418 hydroxyurea (HU) treatment, resistance of TSSK3 deficient cells is rescued after expression  
419 of exogenous protein by doxycycline induction. Results are means of 3 replicates with  
420 standard deviations. (e) Setup as in (c) using resistant ALB1 deficient cells after doxorubicin  
421 treatment.

422

423 **Supplemental Experimental Procedures**

424

425 **Cell Culture**

426 All HAP1 cell lines used in this work were generated using CRISPR-Cas9 gene editing  
427 technology in collaboration with Horizon Genomics (Vienna Austria) as single clones. They  
428 were grown in Iscove's Modified Dulbecco's Medium (IMDM) from GIBCO®, containing L-  
429 Glutamine and 25 mM HEPES and supplemented with 10% heat-inactivated fetal bovine  
430 serum (FBS) and 1% penicillin-streptomycin (P/S at 100 $\mu$ g/mL) and passaged according to

431 standard protocol with trypsin and PBS. All cell lines were grown at 37°C in a 3% oxygen  
432 and 5% CO<sub>2</sub>-humidified incubator.

433

434 HEK293T cells used for virus production were expanded in Dulbecco's Modified Eagle  
435 Medium (DMEM), supplemented with 10% FBS and 1% P/S. Cells were grown at 37°C in a  
436 3% oxygen and 5% CO<sub>2</sub> incubator.

437

#### 438 **Knockout Confirmation by Sanger Sequencing**

439 HAP1 kinase deficient knockout cell lines were validated for gene editing leading to a frame-  
440 shift mutation in the respective genes. We designed forward and reverse primers for each  
441 gene and purchased oligonucleotides from Sigma-Aldrich. For genomic DNA extraction,  
442 cells were treated with trypsin and washed twice with PBS, then resuspended in 100µL  
443 Direct PCR-Cell lysis solution with 2µL Proteinase K (20mg/mL). Wells were sealed and  
444 heated for 2.5 hours at 56°C, then 45 minutes at 80°C to inactivate Proteinase K, followed  
445 by PCR amplification. PCR amplification conditions: heat lid 110°C; 94°C 2 minutes; loop  
446 35x (94°C 30 seconds; 337 55°C 30 seconds; 68°C 1 minute) 68°C 7 minutes. Then the  
447 PCR product was purified using Rapid PCR Cleanup Enzyme Set from BioLabs Inc., diluted  
448 1:2 with double distilled water (ddH<sub>2</sub>O) and sequenced by Microsynth AG. Results were  
449 aligned to respective genes using Basic Local Alignment Search Tool, BLAST provided by  
450 NCBI.

451

#### 452 **High-throughput Drug Screen**

453 Indicated volumes and concentrations of compounds (**Supp. Table 3**) per well were  
454 transferred into 384-well plates (Corning 3712) from DMSO stock plates using acoustic  
455 transfer (Labcyte Echo 520). Wild-type or knockout HAP1 cells (at an amount of 1,000 cells)  
456 were seeded in 50 µl media into the compound-containing plates. Three days later cell  
457 viability was determined using Cell Titer-Glo (Promega). Compounds were used at 4 dose  
458 points with 4 replicates. For data analysis, the percentage of control was calculated and the  
459 signal of the DMSO treated sample was used to set values to 100% survival, while the 25X  
460 camptothecin (cytotoxic concentrations) signal was used to set the values to 0%. Survival  
461 circo plot with DNA repair deficient cells was created using TOPS<sup>44</sup> for analysis and basic  
462 visualization. For kinome survival to DNA damage, areas under the curve (AUC) were  
463 calculated as a cumulative measure of compound potency by taking the sum of the mean of  
464 subsequent concentration points (as applied previously<sup>45</sup>).

465

466

467

## 468 **FACS Screen**

469 Cell Culture: HAP1 cells were cultured as described above for 7 days until 80-90%  
470 confluence. Every HAP1 cell line was seeded into 4 Costar® 6-well cell culture plates, each  
471 plate at a density (cell number/well) according to the time-points of harvest: 160,000 for 5-  
472 hours treatment, 80,000 for 24 hours treatment, 20,000 for 24 hours post treatment and  
473 10,000 for 48 hours post treatment.

474  
475 Drug treatment: The day after seeding, cells were treated with 6 concentrations of the  
476 respective compound. The highest concentration- temozolomide, 250  $\mu$ M; oxaliplatin, 780  
477 nM- was chosen to moderately affect wild-type cells (10 - 30 % cell death). The compounds  
478 were serial diluted 1:2 from the highest to lowest dose. For the untreated control we used  
479 DMSO at a concentration corresponding to the lowest compound dilution. After 24 hours  
480 treatment, media from the remaining time points was aspirated and replaced with 2 mL of  
481 fresh (drug-free) IMDM medium. 40 minutes before each harvest 5-ethynyl-2'-deoxyuridine  
482 (EdU) at a concentration of 10  $\mu$ M was added to each well.

483  
484 Cell harvest: Cells were washed with 400 $\mu$ L phosphate buffer saline (PBS) and detached  
485 with 500 $\mu$ L trypsin, collected with 1 ml of medium, transferred into 96-deep-well (2ml) plates  
486 and centrifuged at 2,000 rpm for 6 min. The supernatant was carefully discarded, cell pellets  
487 were washed with PBS and re-suspended in 100 $\mu$ L fixing solution, containing 4% para-  
488 formaldehyde (PFA) and 0.1% Triton X, transferred into V-bottom shaped 96-well plates,  
489 incubated at 4°C and then stained.

490  
491 FACS staining: 96-well plates, containing fixed cells, were centrifuged at 1,200 rpm for 6 min  
492 then washed with 50 $\mu$ L PBS. Pellets were re-suspended in TUNEL staining solution (*In Situ*  
493 Cell Death Detection Kit, TMR red, Sigma Aldrich) containing anti-phospho-H2A.X (Ser139)  
494 i.e.  $\gamma$ H2AX, clone JBW301 (1:500 dilution, Sigma Aldrich) and incubated for one hour in the  
495 dark at 37°C. Then the pellets were washed three times with PBS (with centrifugations at  
496 1,200 rpm for 6 min) and re-suspended with Click-iT EdU Alexa Fluor 488 Flow Cytometry  
497 Assay Kit staining solution (Thermo Fisher Scientific) containing secondary antibody (1:500  
498 dilution, Alexa Fluor® 647 conjugate, goat anti-Mouse IgG (H+L), Thermo Fisher Scientific)  
499 for detection of  $\gamma$ H2AX and incubated for one hour in the dark at room temperature (RT).  
500 Subsequently pellets were washed three times with PBS and re-suspended in DAPI (Sigma  
501 Aldrich) solution (1:1,000 dilution) and kept dark. Samples were measured using the BD  
502 LSRFortessa cell analyzer machine and data was analyzed using FlowJo v10.3.

503



## 504 **FACS Analysis**

505 For analysis, dead cells were discarded using forward and side scatter and next single cell  
506 populations were gated using DAPI width and DAPI area following the Abcam PI staining  
507 protocol. Gates for  $\gamma$ H2AX and TUNEL were set for all concentrations according to the  
508 untreated (DMSO) control. For all time points, to take all drug concentrations into account,  
509 an area-under-the-curve (AUC) of all six dose points was calculated and compared to  
510 untreated controls. This data is visualized in the phenotypic FACS plot. The cell cycle  
511 phases were determined by gating G1- and G2-phase as well as S-phase of diploid  
512 populations using a DAPI against EdU plot. Proliferating cells were determined by setting a  
513 threshold for cells with positive EdU incorporation and EdU positive signals were plotted  
514 against untreated control cells.

515

## 516 **Reconstitution of Knockout Cell Lines**

517 For reconstitution of the respective wild-type genes in knockout cell lines, we used Gateway-  
518 cloning compatible vector backbones containing the gene of interest and a spectinomycin  
519 resistance cassette, from Addgene. These plasmids of the kind “pDONR223-XXX” were a  
520 gift from William Hahn & David Root and are published in Nature: Johannessen et al (2010  
521 Nov 24.). Bacterial DH5 $\alpha$  were grown on agar plates containing spectinomycin, from which a  
522 single clone was picked and cultured in LB-media containing spectinomycin overnight at  
523 37°C. Plasmids were purified using Quiagen MidiPrep Kit and the LR-reaction was  
524 performed according to the Gateway Technology protocol provided by Invitrogen. We  
525 transferred the cDNA of the gene of interest into the doxycycline inducible pLIX\_402 entry  
526 vector for mammalian expression and lentivirus production containing an Amp<sup>R</sup> cassette.  
527 The entry clones were transformed into Mg<sup>2+</sup>/Ca<sup>2+</sup> competent DH5 $\alpha$  strains, amplified in an  
528 overnight culture in LB-media containing ampicillin and plasmids were extracted using  
529 Qiagen MidiPrep Kit. Lentivirus particles were produced using following plasmids: CMV-  
530 GFP, VSV-G and dR8.91. Virus was harvested for two days in the mornings and evenings.  
531 Knockout cells were infected with virus particles containing the respective gene, selected for  
532 2 days with puromycin at 2  $\mu$ g/mL and cells were propagated for another 2 days.

533

## 534 **Dose Responses**

535 Dose response curves for temozolomide, oxaliplatin, hydroxyurea and doxorubicin were  
536 generated by seeding cells in 96-well plates (1,000 cells/well). The next day, compounds  
537 were added at the indicated concentrations. Cells harboring the reconstituted gene of  
538 interest were additionally treated with doxycycline at 1 $\mu$ g/mL every day. Three days after

539 drug treatment, cell viability was measured using the CellTiter-Glo assay protocol  
540 (Promega).

541

### 542 **Immunoblotting and Antibodies**

543 Cells were harvested and then lysed with RIPA lysis buffer (NEB) supplemented with  
544 protease and phosphatase inhibitors from Sigma. Western blots were performed according  
545 to standard protocols. Protein samples were separated using NuPAGE™ 4-12% gradient  
546 Bis-Tris Protein Gels from Invitrogen and MOPS running buffer at 120 V for 2 hours running  
547 time. The separated proteins were then transferred onto nitrocellulose membranes. To  
548 prevent unspecific protein binding, membranes were treated with blocking solution (5% milk  
549 in TBST) for 1 hour and primary antibodies were added at 1:1,000 to the blocking solution  
550 and incubated overnight at 4°C. The next day, membranes were washed 3x with TBST and  
551 incubated with secondary antibodies at 1:5,000 in 5% milk/TBST solution. Then membranes  
552 were treated with immunoblotting developer solution (GSE) for 1 minute and imaged in the  
553 dark. The following antibodies were used: primary; Rabbit Anti-HA tag antibody - ChIP  
554 Grade (ab9110, Abcam), secondary; Goat Anti-Rabbit IgG, HRP-linked Antibody (#7074,  
555 Cell Signaling).

556

### 557 **Clustering and HiC analysis**

558 Cells were clustered with agglomerative clustering using the R package  
559 ConsensusClusterPlus. Cells and compounds were randomly sub-sampled for 10,000 times  
560 and clustered using complete linkage to increase the robustness of clustering. The distance  
561 was calculated using the Pearson correlation. Hi-C values for all genes in each cluster were  
562 retrieved from the covariate matrix of MutSigCV v1.2.01<sup>46</sup> and the corresponding  
563 distributions were compared with Wilcoxon rank-sum test.

564

### 565 **Gene ontology term enrichment analysis**

566 Gene ontology (GO) term enrichments were calculated using Enricher, a comprehensive tool  
567 for gene set enrichment analysis<sup>47</sup>. P-values were calculated using a Fisher's exact test and  
568 corrected for multiple hypotheses using a cut-off of p-value < 0.05. In order to filter for  
569 redundant and unspecific GO terms, we first removed all GO terms that are annotated to  
570 more than 70 genes and further summarized terms based on their Resnik semantic  
571 similarity<sup>48</sup> using the tool ReviGO<sup>49</sup>.

572

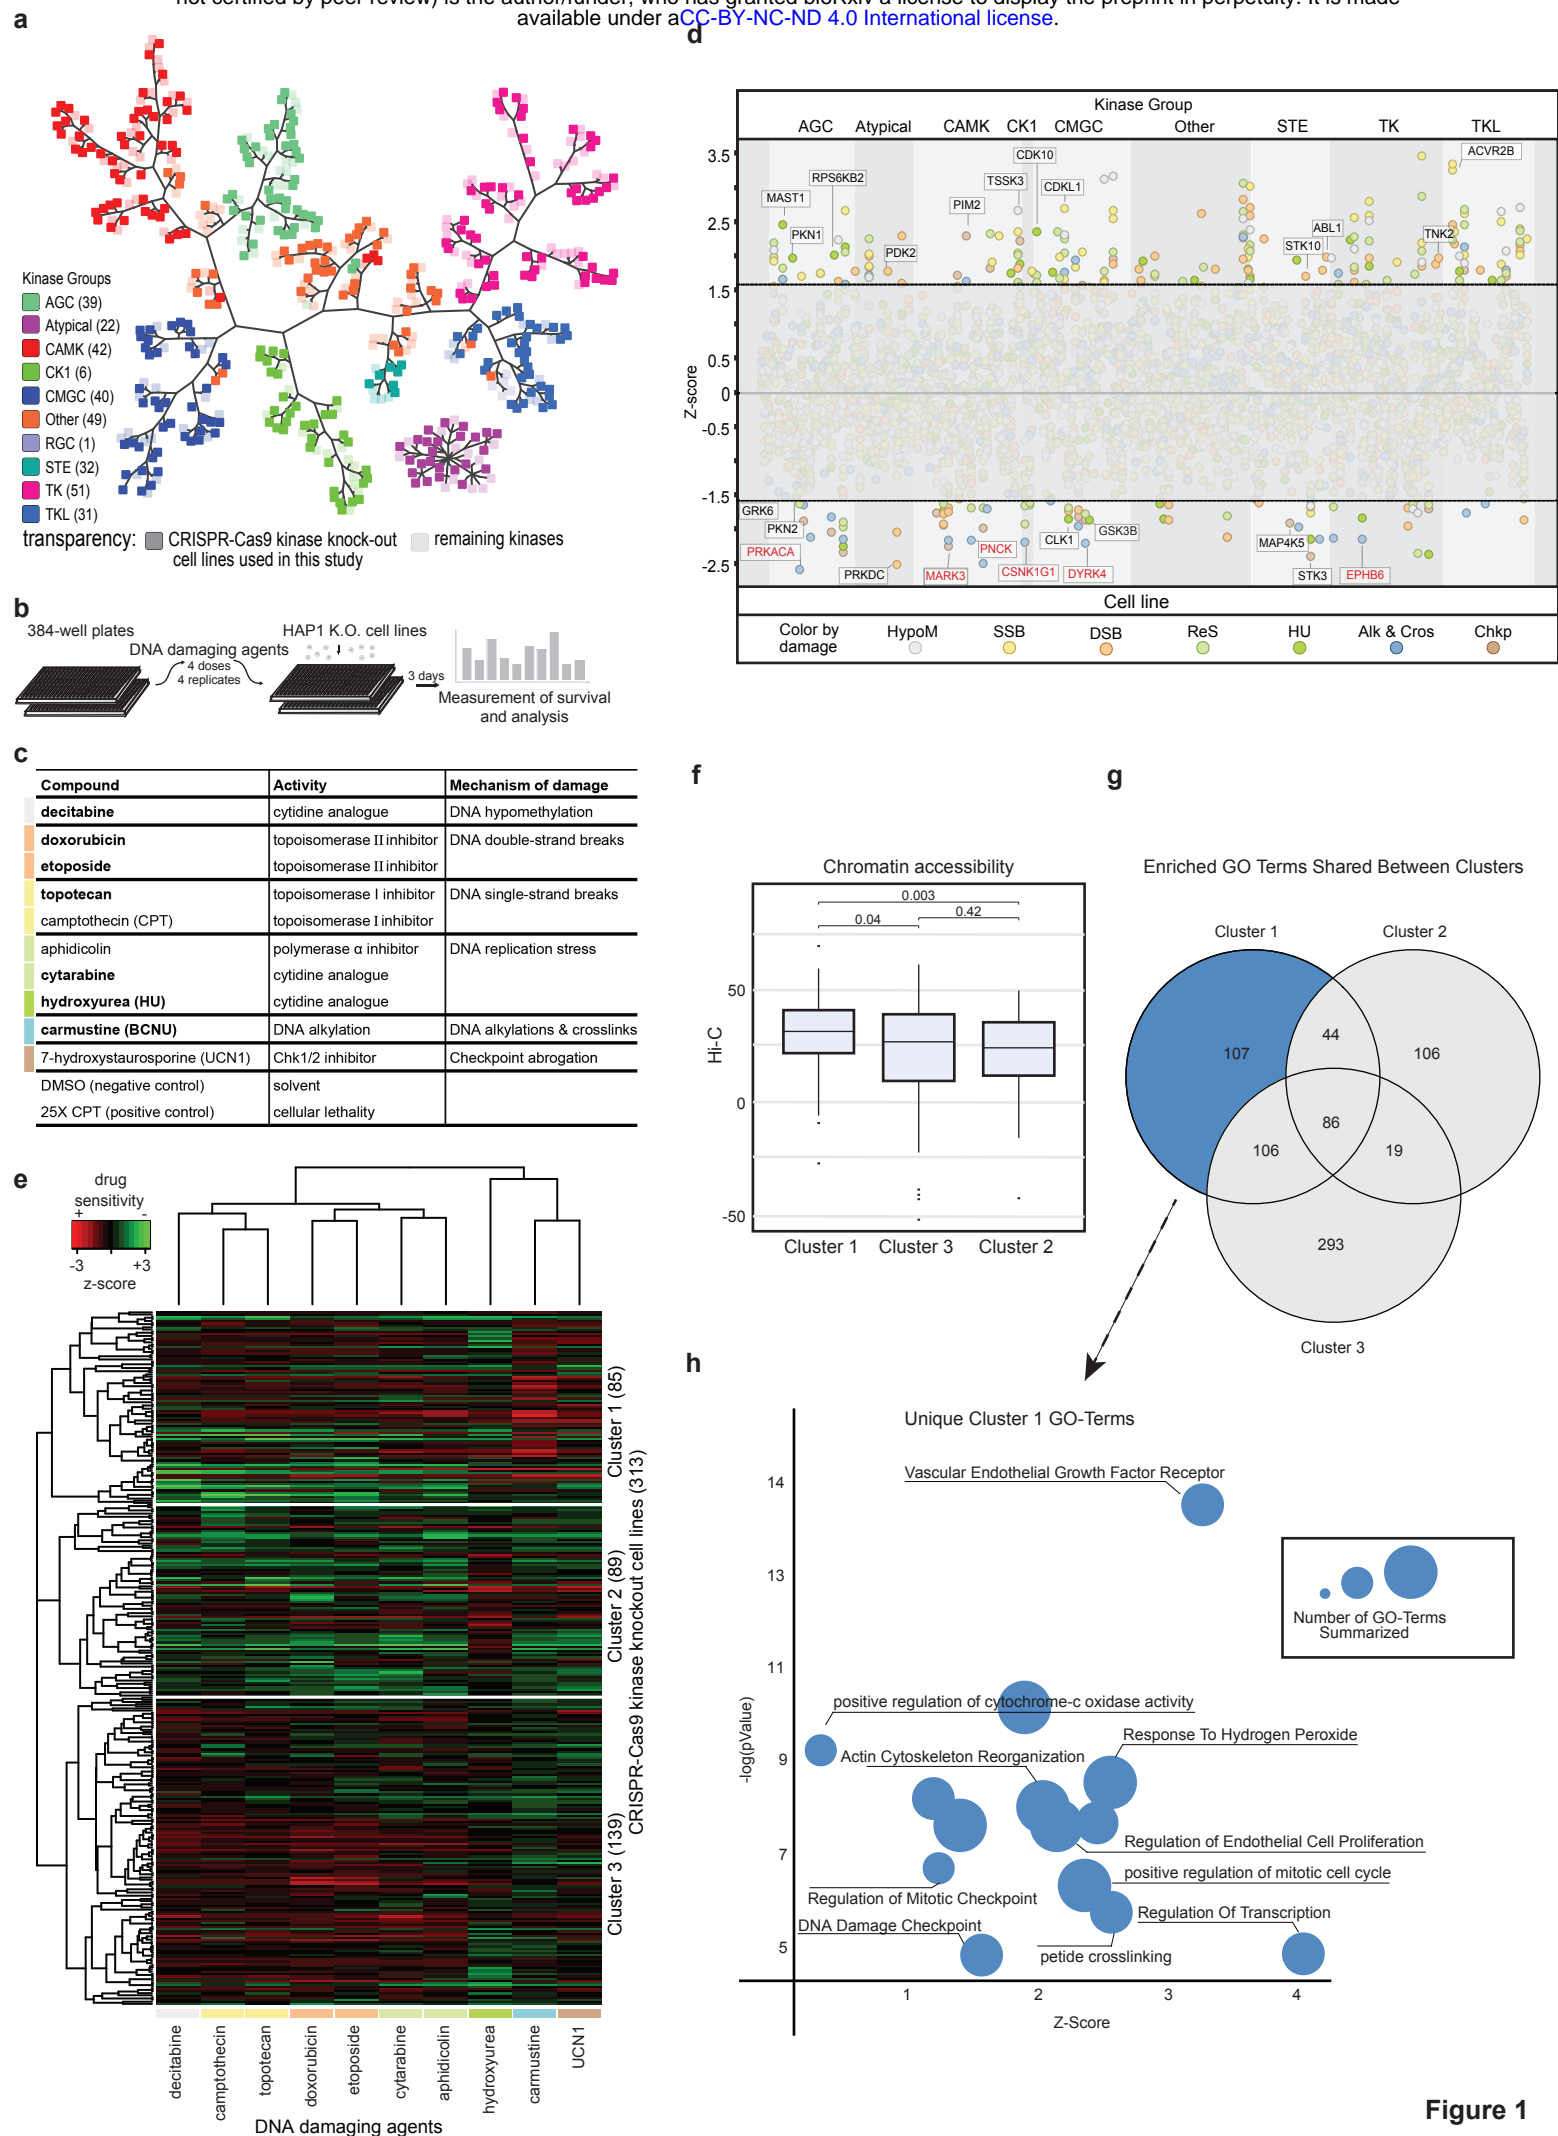

Figure 1







a

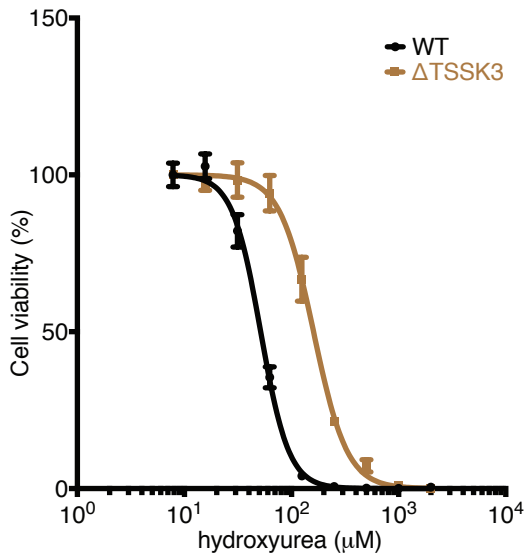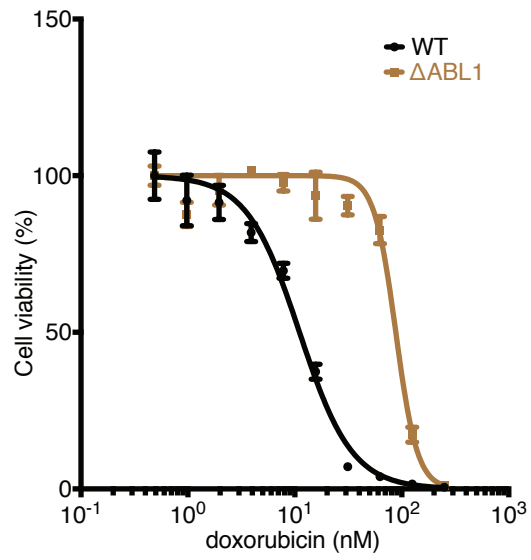

c

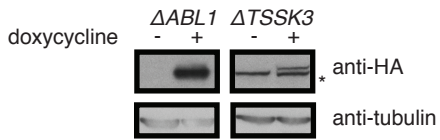

d

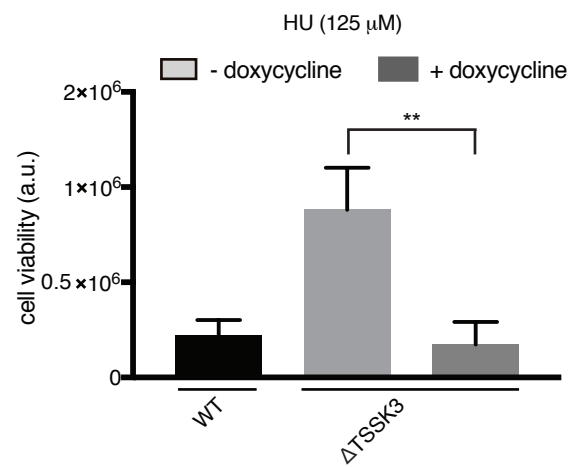

e

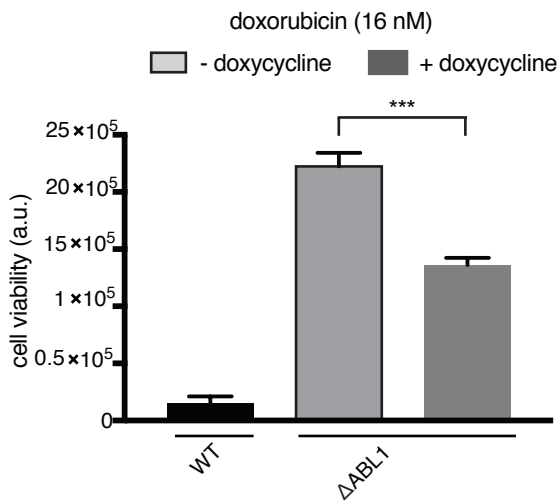

Figure S2
